# Supplementary material for: Nanosheet floral clusters of Fe-doped Co3O4 for high-performance supercapacitors
Source: Royal Society of Chemistry journal article supplement (doi:10.1039/d4qm00170b), 2024-01-01
Supplement: d4qm00170b1.pdf [file d4qm00170b1.pdf]

## Supporting information

### Nanosheet floral clusters of Fe-doped $\text{Co}_3\text{O}_4$ for high-performance supercapacitors

Congcong Lu, Yu Yang, Songjun Li\*, Maiyong Zhu\*

School of Materials Science & Engineering, Jiangsu University, Zhenjiang 212013, China

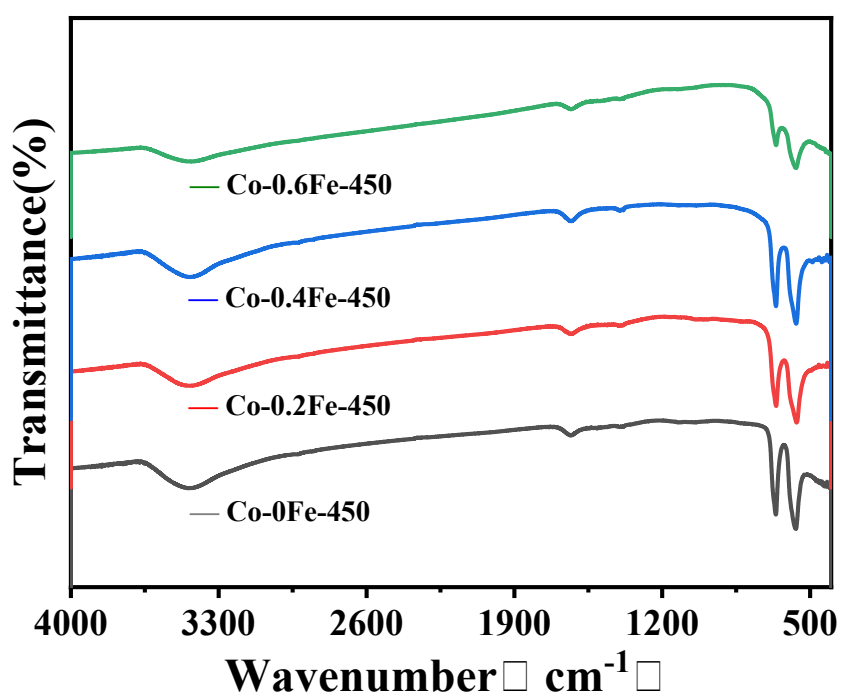

Figure S1. FTIR spectra of samples prepared at different ratios.

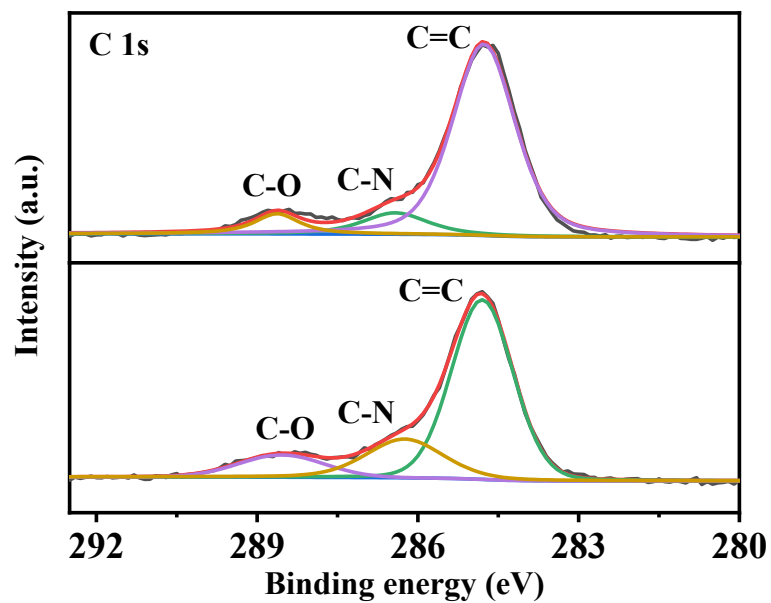

Figure S2. XPS spectra of Co-0Fe-450 and Co-0.2Fe-450.

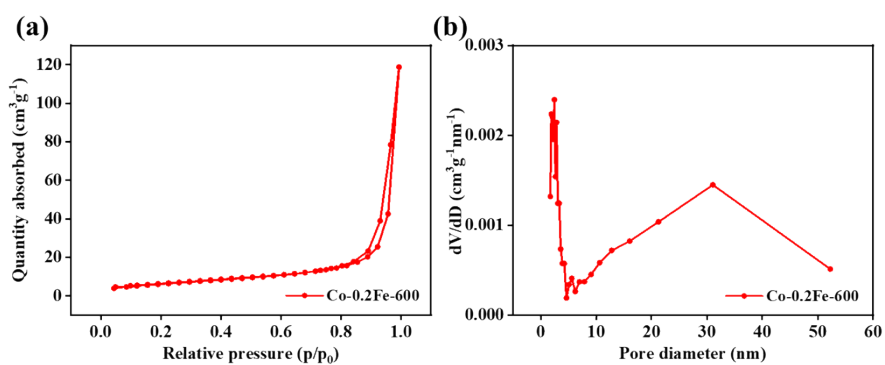

Figure S3. (a) N<sub>2</sub> adsorption-desorption curve, (b) pore size distribution for Co-0.2Fe-600

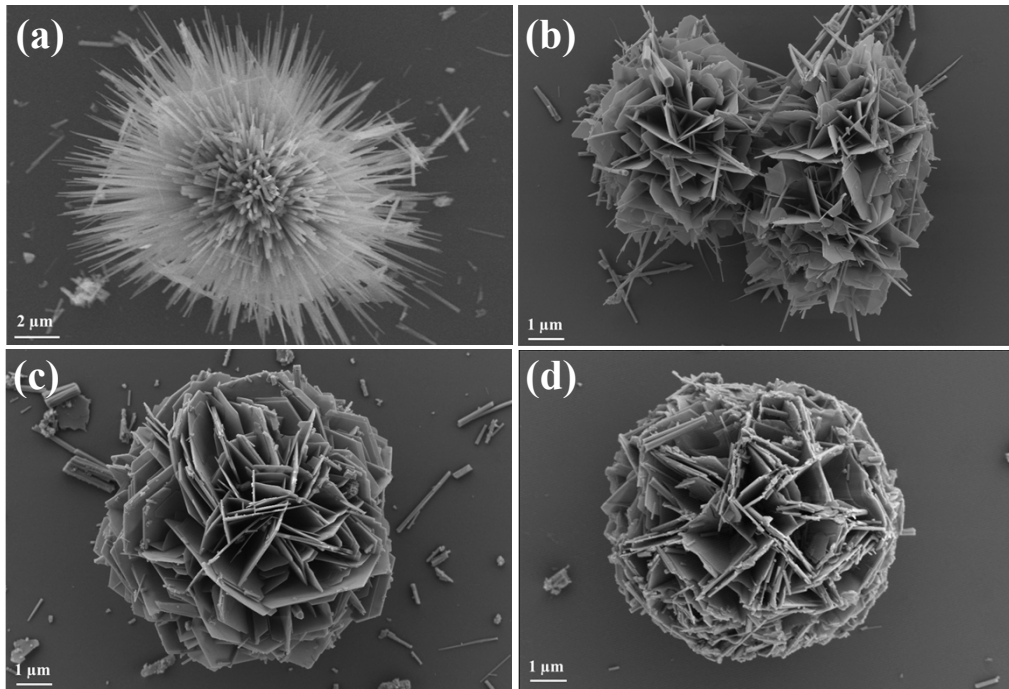

Figure S4. SEM images of (a)Co-0Fe; (b)Co-0.2Fe; (c)Co-0.4Fe; (d)Co-0.6Fe.

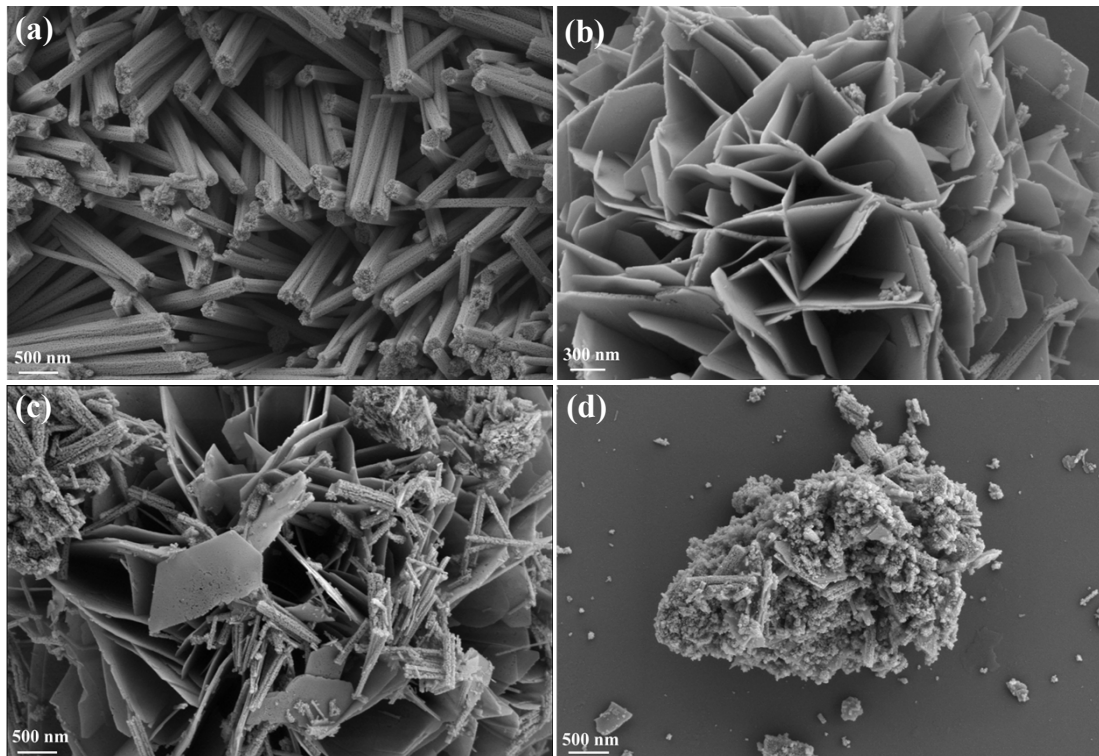

Figure S5. SEM images of (a)Co-0Fe-450; (b)Co-0.2Fe-450; (c)Co-0.4Fe-450; (d)Co-0.6Fe-450.

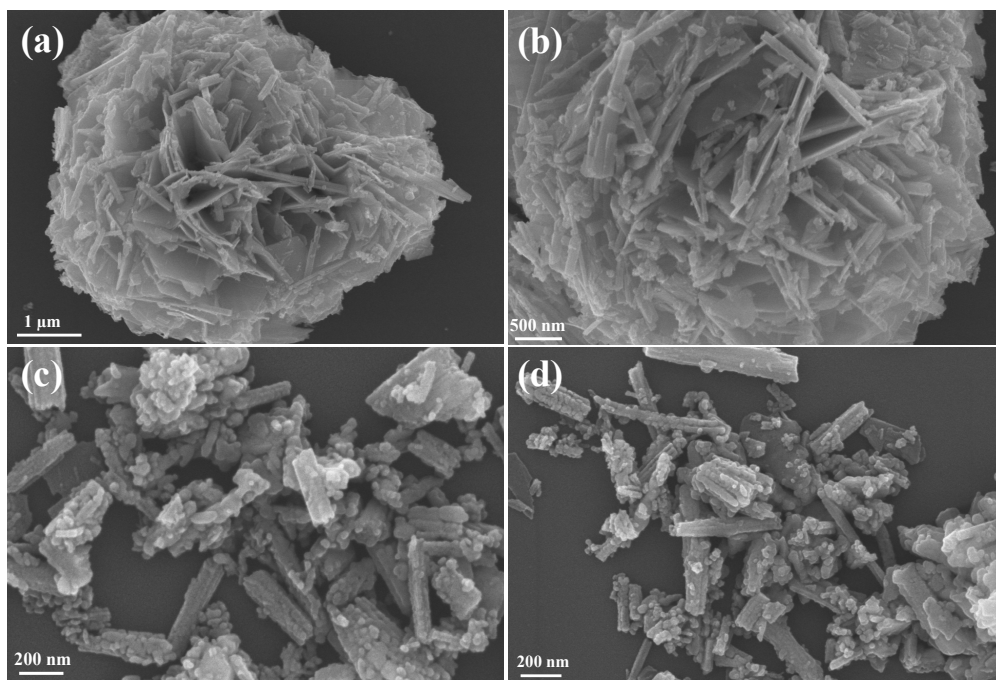

Figure S6. SEM images of (a,b) Co-0.2Fe-350, (c,d) Co-0.2Fe-600.

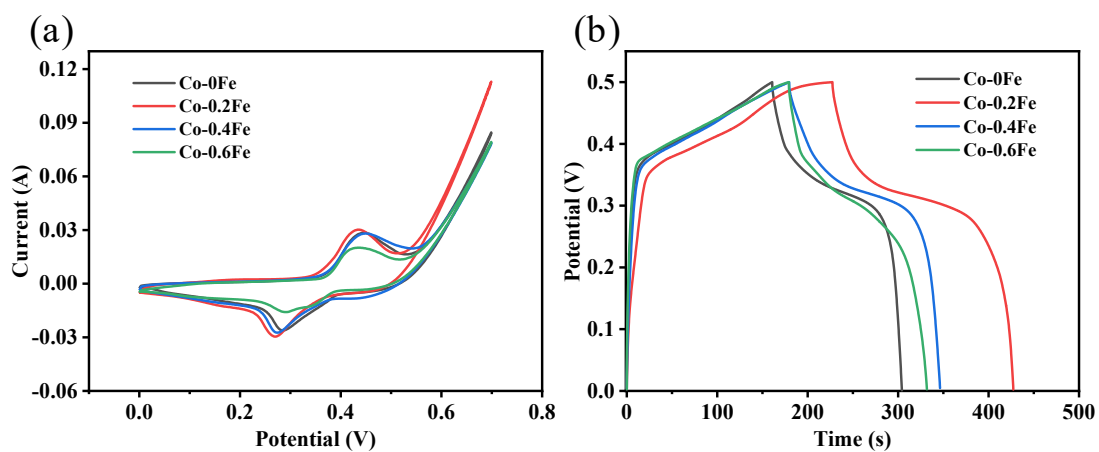

Figure S7. Co-0Fe, Co-0.2Fe, Co-0.4Fe, Co-0.6Fe with (a) CV curves at  $10 \text{ mV s}^{-1}$ , (b) GCD curves at  $1 \text{ A g}^{-1}$  current density.

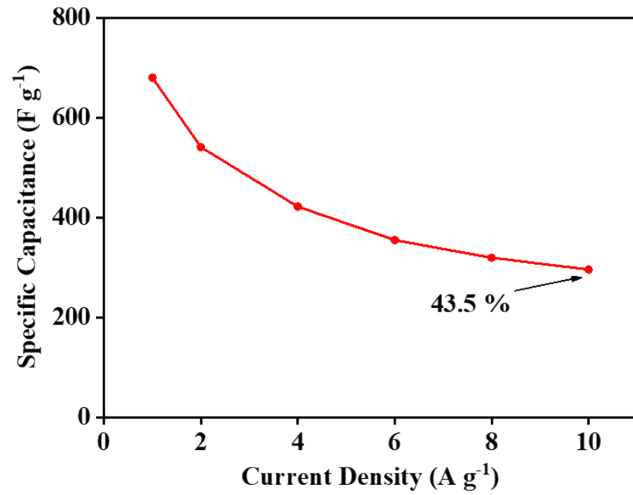

Figure S8. Curve of specific capacitance versus current density.

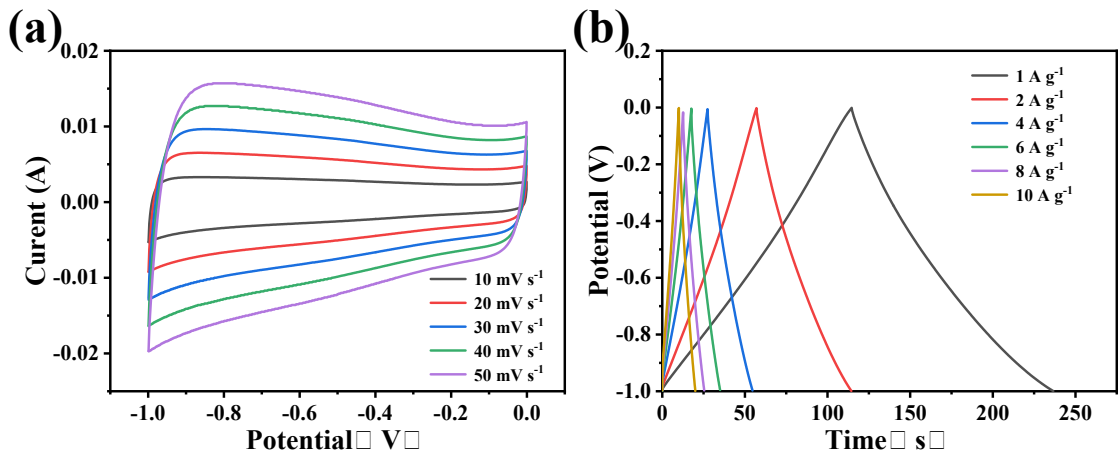

Figure S9. (a) CV curves of AC at different scan rates, (b) GCD profiles of AC at different current densities.

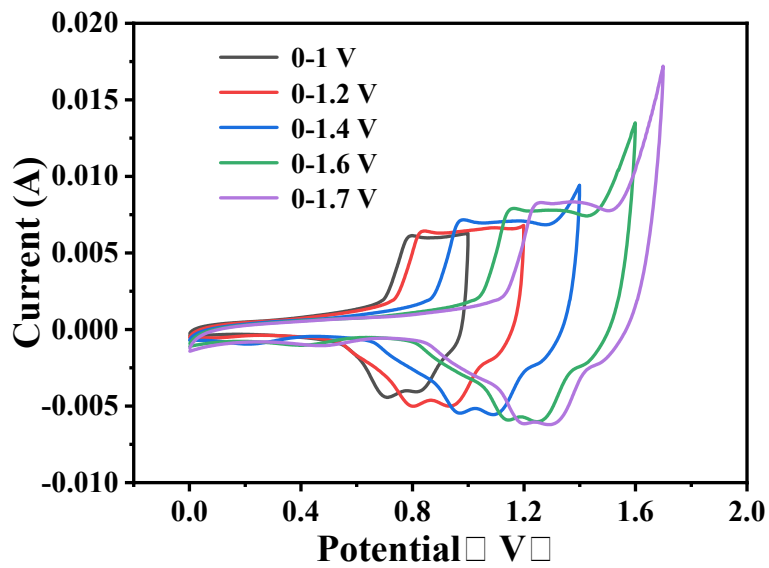

Figure S10. CV curves of Co-0.2Fe-450 //AC at 20 mv s<sup>-1</sup> for different voltage windows.

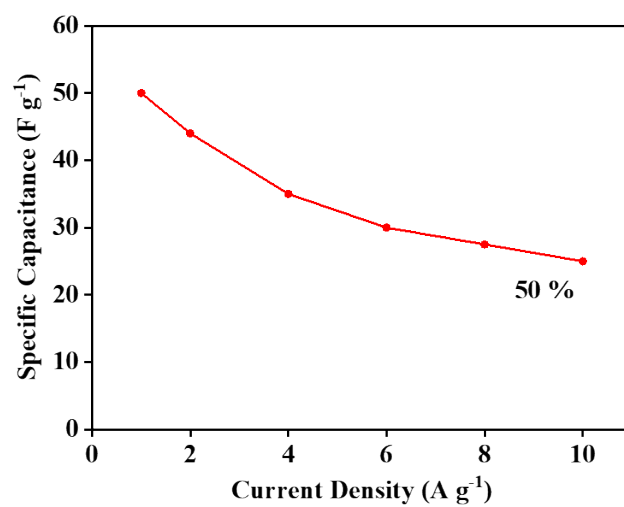

Figure S11. Curve of specific capacitance versus current density.
